# Supplementary material
Source: PubMed Central journal article supplement (PMC2077257)
Supplement: pnas_0706487104_1.pdf [file pnas_0706487104_1.pdf]

|            |            |     |    |                       |              |            |                |              |               |                |              |         |            |       |        |        |       |        |        |        |        |        |      |      |      |     |    |      |   |    |
|------------|------------|-----|----|-----------------------|--------------|------------|----------------|--------------|---------------|----------------|--------------|---------|------------|-------|--------|--------|-------|--------|--------|--------|--------|--------|------|------|------|-----|----|------|---|----|
| <b>IV</b>  | hsHDAC11   | 1   | :- | HTHTTQNYQHVPSTRWPIVYS | SPRYNTTFMGLS | -----      | KHFPDAGKWKVINF | KBEKLLS      | -----         | DSMLVBARBASED  | LLVVH        | :       | 75         |       |        |        |       |        |        |        |        |        |      |      |      |     |    |      |   |    |
|            | aaHDLP     | 1   | :- | -----                 | KKVKLIGTLY   | -GKYRYP    | -----          | KNHPLKPRVSL  | LLRFLDAMNLI   | -----          | SKELIKSRPAT  | KEELLI  | FFH        | :     | 60     |        |       |        |        |        |        |        |      |      |      |     |    |      |   |    |
| <b>I</b>   | hsHDAC1    | 1   | :- | MAQTQGT               | RRKCYYYD     | GVGNYYYGQ  | -----          | GHPMKPHRIRMT | HNLLNLYGLYR   | -----          | KMFIYRPHKAN  | AEBMT   | TKYH       | :     | 68     |        |       |        |        |        |        |        |      |      |      |     |    |      |   |    |
|            | hsHDAC2    | 1   | :- | MAYSQGGG              | KKKVCYYYD    | GTIGNYYYGQ | -----          | GHPMKPHRIRMT | HNLLNLYGLYR   | -----          | KMFIYRPHKATA | AEBMT   | TKYH       | :     | 69     |        |       |        |        |        |        |        |      |      |      |     |    |      |   |    |
|            | hsHDAC3    | 1   | :- | MAKTVA                | YFYD         | PDVGNFYGA  | -----          | GHPMKPHRLAL  | THSLVLYHYGLYK | -----          | KMIVFKPYQAS  | QHD     | MCRFH      | :     | 62     |        |       |        |        |        |        |        |      |      |      |     |    |      |   |    |
|            | hsHDAC8    | 1   | :- | NEEPEFP               | ADSGQSLV     | PYYTYS     | PFYVSMCDS      | -----        | LAKTPKRAS     | VMVHSLTEAYALHK | -----        | QMRTV   | KPKVASMEEM | ATFH  | :      | 71     |       |        |        |        |        |        |      |      |      |     |    |      |   |    |
| <b>II</b>  | hsHDAC6_D1 | 70  | :  | GIQGM                 | DNLEAEALACT  | GLVLD      | EQINFHCLWD     | -----        | DSFP          | EGPRLHAJK      | QLIQGLLD     | -----   | RCV        | SQARE | AKKEEL | MLVH   | :     | 145    |        |        |        |        |      |      |      |     |    |      |   |    |
|            | hsHDAC6_D2 | 7   | :  | PEVLP                 | PLITW        | PVLSRRT    | GLVYDONMMNH    | CNLWD        | -----         | SHH            | PEVPORTLIR   | ICRLEEL | GLAG       | ----- | RCL    | TLTPRP | ATE   | ABELL  | TCH    | :      | 82     |        |      |      |      |     |    |      |   |    |
|            | hsHDAC10   | 1   | :- | -----                 | NGTALVY      | HEDMTA     | TRLLWD         | D            | -----         | EC             | ERPRRL       | TAAL    | DRLR       | ORGL  | EQ     | -----  | RCL   | RSARE  | ASEEEL | GLVH   | :      | 64     |      |      |      |     |    |      |   |    |
|            | hsHDAC4    | 647 | :- | PTKPR                 | FTTGLVY      | DTLML      | KHQC           | TCGSS        | -----         | SSH            | PEHAGRI      | QST     | WSRL       | QBT   | GLRG   | -----  | KCE   | CLRGR  | KAT    | LEEL   | QTVH   | :      | 715  |      |      |     |    |      |   |    |
|            | hsHDAC7    | 512 | :- | PART                  | PF           | TG         | LIYDS          | VMLKHQ       | CSCGN         | -----          | SRH          | PEHAGRI | QST        | WSRL  | QBT    | GLRS   | ----- | QCE    | CLRGR  | KAT    | LEEL   | QTVH   | :    | 581  |      |     |    |      |   |    |
|            | hsHDAC9    | 628 | :- | QPG                   | SAT          | GIAYD      | PMLKHQ         | CVCNS        | -----         | TH             | PEHAGRI      | QST     | WSRL       | QBT   | GLLN   | -----  | KCE   | R      | GRKAS  | LEEL   | QTVH   | :      | 694  |      |      |     |    |      |   |    |
|            | hsHDAC5    | 676 | :- | PV                    | KHLETT       | GVVYD      | FMLKHQ         | CMCGNT       | -----         | HV             | PEHAGRI      | QST     | WSRL       | QBT   | GLLS   | -----  | KCE   | R      | GRKAT  | LEEL   | QTVH   | :      | 744  |      |      |     |    |      |   |    |
| <b>Ila</b> | dmHDAC4    | 819 | :- | KVT                   | TGLAYD       | PMLKH      | SCICGN         | -----        | AQ            | PEHAGRI        | QST          | WSRL    | QBT        | GLV   | -----  | RC     | DR    | LARKAT | Q      | LEEL   | QTVH   | :      | 883  |      |      |     |    |      |   |    |
|            | dpHDAC4    | 741 | :- | KITT                  | TGLAYD       | PMLKH      | SCICGN         | -----        | AQ            | PEHAGRI        | QST          | WSRL    | QBT        | GLV   | -----  | RC     | DR    | LARKAT | Q      | LEEL   | QTVH   | :      | 805  |      |      |     |    |      |   |    |
|            | ceHDA-4    | 344 | :- | PT                    | CTTGL        | GYDQ       | AMVRHE         | CCCGNN       | -----         | ASH            | VENG         | GRI     | QST        | WSRL  | QBT    | GLV    | ----- | KCE    | KV     | TAKKAS | LEEL   | QTVH   | :    | 409  |      |     |    |      |   |    |
|            | cbHDA-4    | 478 | :- | PT                    | FSTGL        | GYD        | P              | MARH         | CVCNN         | -----          | SNH          | VENG    | GRI        | QST   | WSRL   | QBT    | GLV   | -----  | KCE    | R      | TAKKAS | LEEL   | QTVH | :    | 543  |     |    |      |   |    |
|            | ciHDAC4    | 583 | :- | RYT                   | TGLAYS       | PV         | M              | LKHG         | CACRDD        | -----          | HTE          | HAGRI   | QST        | WSRL  | QBT    | GLV    | ----- | RC     | DR     | LARKAT | Q      | LEEL   | QTVH | :    | 656  |     |    |      |   |    |
|            | csHDAC4    | 486 | :- | RYT                   | TGLAYS       | PV         | M              | LKHG         | CACRDD        | -----          | HA           | E       | HAGRI      | QST   | WSRL   | QBT    | GLV   | -----  | RC     | DR     | LARKAT | Q      | LEEL | QTVH | :    | 559 |    |      |   |    |
|            | hrHDAC4    | 20  | :- | RYT                   | TGLAYS       | PV         | M              | LKHG         | CACRDD        | -----          | HA           | B       | HAGRI      | QST   | WSRL   | QBT    | GLV   | -----  | K      | CEN    | DR     | LARKAT | Q    | LEEL | QTVH | :   | 82 |      |   |    |
| <b>II</b>  | baFB188    | 1   | :- | MAT                   | GYV          | WNTLY      | GWVDT          | GTGSL        | AAANL         | TAR            | QPT          | SHHL    | AHP        | DT    | KRR    | PH     | ELV   | CA     | SG     | QTE    | -----  | H      | LTP  | AAVA | AT   | D   | DI | IRAH | : | 76 |

Mot a CC

|            |            |     |   |   |      |      |   |      |       |     |   |      |       |   |      |   |   |   |   |     |     |     |   |   |   |   |     |     |     |     |       |   |   |   |   |   |   |   |     |   |   |   |   |     |   |     |     |   |   |   |   |   |   |     |   |   |     |   |   |     |   |     |     |     |     |   |   |   |   |   |   |   |   |   |   |     |     |     |   |     |     |   |     |     |     |   |     |   |   |   |   |   |   |   |   |   |     |     |     |   |     |   |   |   |   |   |     |
|------------|------------|-----|---|---|------|------|---|------|-------|-----|---|------|-------|---|------|---|---|---|---|-----|-----|-----|---|---|---|---|-----|-----|-----|-----|-------|---|---|---|---|---|---|---|-----|---|---|---|---|-----|---|-----|-----|---|---|---|---|---|---|-----|---|---|-----|---|---|-----|---|-----|-----|-----|-----|---|---|---|---|---|---|---|---|---|---|-----|-----|-----|---|-----|-----|---|-----|-----|-----|---|-----|---|---|---|---|---|---|---|---|---|-----|-----|-----|---|-----|---|---|---|---|---|-----|
| <b>IV</b>  | hsHDAC11   | 76  | : | T | RRYL | NEIK | W | SFAV | ATITE | --- | P | PVIF | ----- | P | NELV | Q | R | - | K | VLR | P   | L   | R | T | Q | T | G   | T   | I   | M   | A     | G | K | L | A | V | E | R | --- | G | W | A | I | N   | G | -   | G   | F | H | C | S | S | D | R   | G | : | 149 |   |   |     |   |     |     |     |     |   |   |   |   |   |   |   |   |   |   |     |     |     |   |     |     |   |     |     |     |   |     |   |   |   |   |   |   |   |   |   |     |     |     |   |     |   |   |   |   |   |     |
|            | aaHDLP     | 61  | : | T | E    | D    | Y | I    | N     | T   | L | M    | E     | A | R    | C | Q | C | P | K   | -   | G   | A | R | E | K | Y   | N   | I   | G   | ----- | G | Y | N | P | V | S | - | A   | M | F | T | G | S   | L | A   | T   | G | S | T | V | A | I | E   | E | F | L   | K | G | --- | N | V   | A   | F   | N   | P | N | G | - | G | H | H | A | F | K | S   | R   | A   | : | 137 |     |   |     |     |     |   |     |   |   |   |   |   |   |   |   |   |     |     |     |   |     |   |   |   |   |   |     |
| <b>I</b>   | hsHDAC1    | 69  | : | S | D    | D    | Y | I    | K     | F   | L | R    | S     | I | R    | P | D | N | M | S   | E   | Y   | S | K | O | M | Q   | R   | F   | N   | ---   | G | E | D | C | P | V | F | -   | G | L | F | E | C   | Q | L   | S   | T | G | G | S | V | A | S   | A | V | K   | N | K | Q   | O | T   | --- | D   | I   | A | V | N | W | A | G | - | G | L | H | H   | A   | K   | K | S   | E   | A | :   | 147 |     |   |     |   |   |   |   |   |   |   |   |   |     |     |     |   |     |   |   |   |   |   |     |
|            | hsHDAC2    | 70  | : | S | D    | E    | Y | I    | K     | F   | L | R    | S     | I | R    | P | D | N | M | S   | E   | Y   | S | K | O | M | Q   | R   | F   | N   | ---   | G | E | D | C | P | V | F | -   | G | L | F | E | C   | Q | L   | S   | T | G | G | S | V | A | G   | A | V | K   | N | R | Q   | O | T   | --- | D   | M   | A | V | N | W | A | G | - | G | L | H | H   | A   | K   | K | F   | E   | A | :   | 148 |     |   |     |   |   |   |   |   |   |   |   |   |     |     |     |   |     |   |   |   |   |   |     |
|            | hsHDAC3    | 63  | : | S | D    | D    | Y | I    | K     | F   | L | R    | S     | I | R    | P | D | N | M | S   | E   | Y   | S | K | O | M | Q   | R   | F   | N   | ---   | G | E | D | C | P | V | F | -   | G | L | F | E | C   | S | R   | Y   | T | G | A | S | L | O | G   | A | T | Q   | L | N | N   | K | I   | C   | --- | D   | I | A | I | N | W | A | G | - | G | L | H   | H   | A   | K | K   | F   | E | A   | :   | 141 |   |     |   |   |   |   |   |   |   |   |   |     |     |     |   |     |   |   |   |   |   |     |
|            | hsHDAC8    | 72  | : | T | D    | A    | Y | L    | Q     | H   | L | Q    | K     | V | S    | Q | E | G | D | D   | H   | -   | P | O | S | I | E   | Y   | G   | --- | G     | Y | D | C | P | A | T | E | -   | G | I | F | Y | A   | A | A   | T   | G | G | A | T | I | T | A   | A | Q | C   | L | I | G   | M | C   | -   | K   | V   | A | I | N | W | S | G | - | G | W | H | A   | K   | K   | D | E   | A   | : | 149 |     |     |   |     |   |   |   |   |   |   |   |   |   |     |     |     |   |     |   |   |   |   |   |     |
| <b>II</b>  | hsHDAC6_D1 | 146 | : | S | I    | E    | Y | I    | D     | L   | M | E    | T     | T | O    | Y | M | N | E | G   | --- | S   | L | R | V | L | A   | --- | --- | --- | T     | Y | D | S | V | L | H | P | N   | S | Y | S | C | A   | C | L   | A   | S | G | S | V | L | R | L   | V | D | A   | V | I | G   | A | B   | T   | --- | R   | N | G | M | A | I | R | P | P | G | H | A   | Q   | H   | S | L   | H   | : | 222 |     |     |   |     |   |   |   |   |   |   |   |   |   |     |     |     |   |     |   |   |   |   |   |     |
|            | hsHDAC6_D2 | 83  | : | S | A    | E    | Y | V    | G     | H   | I | R    | A     | T | E    | K | M | K | T | R   | --- | S   | L | H | R | E | S   | --- | --- | --- | N     | F | D | S | I | Y | I | C | P   | S | T | F | A | C   | A | Q   | L   | A | T | G | A | A | C | R   | L | V | E   | A | V | L   | S | G   | E   | V   | --- | L | N | G | A | A | V | V | R | P | P | G   | H   | A   | B | O   | D   | A | :   | 159 |     |   |     |   |   |   |   |   |   |   |   |   |     |     |     |   |     |   |   |   |   |   |     |
|            | hsHDAC10   | 65  | : | S | P    | H    | Y | S    | L     | V   | R | E    | T     | O | V    | L | G | K | E | --- | S   | Q   | A | L | S | G | --- | --- | --- | Q   | F     | D | A | I | F | H | P | S | T   | F | H | C | A | R   | L | A   | G   | A | G | L | O | L | V | D   | A | V | L   | T | G | A   | V | --- | O   | N   | G   | L | A | L | M | R | P | P | G | H | G | O   | R   | A   | A | :   | 141 |   |     |     |     |   |     |   |   |   |   |   |   |   |   |   |     |     |     |   |     |   |   |   |   |   |     |
|            | hsHDAC4    | 716 | : | S | E    | A    | H | T    | L     | L   | Y | G    | T     | N | P    | L | N | R | O | K   | L   | D   | S | K | K | L | I   | G   | S   | L   | ---   | S | V | F | V | R | L | P | C   | G | G | V | G | V   | D | --- | S   | D | T | I | W | N | E | L   | H | S | A   | G | A | R   | L | A   | V   | G   | C   | V | V | L | V | F | K | V | A | T | G | E   | L   | --- | K | N   | G   | F | A   | V   | V   | R | P   | P | G | H | A | B | E | S | T | P | :   | 809 |     |   |     |   |   |   |   |   |     |
|            | hsHDAC7    | 582 | : | S | E    | R    | H | V    | L     | L   | Y | G    | T     | N | P    | L | N | R | O | K   | L   | D   | S | K | K | L | I   | G   | S   | L   | ---   | Q | R | M | F | V | M | L | P   | C | G | G | V | G   | V | D   | --- | T | D | T | I | W | N | E   | L | H | S   | S | N | A   | A | R   | W   | A   | A   | G | S | V | T | D | L | A | F | K | V | A   | S   | R   | E | L   | --- | K | N   | G   | F   | A | V   | V | R | P | P | G | H | A | D | H | S   | T   | A   | : | 676 |   |   |   |   |   |     |
|            | hsHDAC9    | 695 | : | S | E    | H    | H | S    | L     | L   | Y | G    | T     | N | P    | L | N | R | O | K   | L   | D   | S | K | K | L | I   | G   | S   | L   | ---   | P | R | I | L | L | G | D | S   | Q | K | F | F | S   | L | P   | C   | G | G | L | G | V | D | --- | S | D | T   | I | W | N   | E | L   | H   | S   | S   | G | A | R | M | A | V | G | C | V | L | E   | L   | A   | S | K   | V   | A | S   | G   | E   | L | --- | K | N | G | F | A | V | V | R | P | P   | G   | H   | A | B   | E | S | T | A | : | 789 |
|            | hsHDAC5    | 745 | : | S | E    | Y    | H | T    | L     | L   | Y | G    | T     | N | P    | L | N | R | O | K   | L   | D   | S | K | K | L | I   | G   | S   | L   | ---   | Q | K | M | Y | A | V | L | P   | C | G | G | L | G   | V | D   | --- | S | D | T | V | W | N | E   | L | H | S   | S | A | V   | R | M   | A   | V   | G   | C | V | L | E | L | A | F | K | V | A | A   | G   | E   | L | --- | K   | N | G   | F   | A   | I | R   | P | P | G | H | A | B | E | S | T | A   | :   | 839 |   |     |   |   |   |   |   |     |
| <b>Ila</b> | dmHDAC4    | 884 | : | T | E    | A    | H | A    | M     | L   | F | G    | S     | N | Q    | C | L | S | R | P   | K   | --- | L | E | N | T | L   | S   | A   | --- | S     | F | V | R | L | S | C | G | G   | L | G | V | D | --- | L | D   | T   | W | N | E | L | H | T | A   | T | A | A   | R | M | A   | A | G   | C   | V   | I   | D | L | A | K | T | A | K | G | D | L | --- | R   | N   | G | F   | A   | V | V   | R   | P   | P | G   | H | A | B | E | A | N | L | A | : | 974 |     |     |   |     |   |   |   |   |   |     |
|            | dpHDAC4    | 806 | : | T | E    | A    | H | A    | M     | L   | F | G    | S     | N | Q    | C | L | T | R | P   | K   | --- | L | E | T | T | L   | A   | A   | --- | S     | F | V | R | L | S | C | G | G   | L | G | V | D | --- | L | D   | T   | W | N | E | L | H | T | A   | T | A | A   | R | M | A   | A | G   | C   | V   | I   | D | L | A | F | K | T | A | K | G | D | L   | --- | R   | N | G   | F   | A | V   | V   | R   | P | P   | G | H | A | B | E | A | N | L | A | :   | 896 |     |   |     |   |   |   |   |   |     |
|            | ceHDA-4    |     |   |   |      |      |   |      |       |     |   |      |       |   |      |   |   |   |   |     |     |     |   |   |   |   |     |     |     |     |       |   |   |   |   |   |   |   |     |   |   |   |   |     |   |     |     |   |   |   |   |   |   |     |   |   |     |   |   |     |   |     |     |     |     |   |   |   |   |   |   |   |   |   |   |     |     |     |   |     |     |   |     |     |     |   |     |   |   |   |   |   |   |   |   |   |     |     |     |   |     |   |   |   |   |   |     |

|     |            | S       | CZZ                                                                                                      | S                                                                                                        |       |  |
|-----|------------|---------|----------------------------------------------------------------------------------------------------------|----------------------------------------------------------------------------------------------------------|-------|--|
| IV  | hsHDAC11   | 150     | :GGFCYADITLAIKFLFER--VEGTSRATITDIDAHQGNHGRDFMDDKRVYIMDVYNRH---YYPG--DRFAKQAIR-----RKVELEWG-----TEDDE     | : 233                                                                                                    |       |  |
|     | aaHDLP     | 138     | :NGFCYINDPAVGIETYLK--KGFKRLLYIDIDAHHCQGVQAFYTDQVFLSLHQSFE-YAFPFK-KGFLEETGGKKGKYNINIPFK---GLNDNE          | : 229                                                                                                    |       |  |
| I   | hsHDAC1    | 148     | :SGFCYVNDIVLAIIEELLK---YHORVLYIDIDIHGGDGVBAFYTTDRVMTVSFHKYGE--YFPG--TGDLRDIIAGKGYKYYAVNYPDRD---GIDDES    | : 236                                                                                                    |       |  |
|     | hsHDAC2    | 149     | :SGFCYVNDIVLAIIEELLK---YHORVLYIDIDIHGGDGVBAFYTTDRVMTVSFHKYGE--YFPG--TGDLRDIIAGKGYKYYAVNYPDRD---GIDDES    | : 237                                                                                                    |       |  |
|     | hsHDAC3    | 142     | :SGFCYVNDIVLAIIEELLK---YHORVLYIDIDIHGGDGVQAFYTTDRVMTVSFHKYGN-YFPG--TGDMYEVGAEISGRYYCINVPDRD---GIDDES     | : 231                                                                                                    |       |  |
|     | hsHDAC8    | 150     | :SGFCYINDAVLIGTLRLRR---KFRRLYIDIDIHGGDVEDAFSETSKVMTVSLHKESP-GFFPG--TGDVSDVGLKGRYYSINVPDRD---GIDDES       | : 239                                                                                                    |       |  |
| II  | hsHDAC6_D1 | 223     | :DGYCFNHVAVAAARYAQQK--HRIIRVLIQVWDVHHGGQTQTFDQDPSVLYFSIHRYSQGRFPHKASNWSSTGFGQGGYTNVVPWNO---VMGRDAD       | : 318                                                                                                    |       |  |
|     | hsHDAC6_D2 | 160     | :CGFCFFNSVAVAAARHAQTI--SHALRLLIWDVWDVHHGNGTQHMFEDDPSVLYVSLHRYDHGTFFPMGDBGASSQTGRAAGTGFTVNVAVNG---PRMGDAD | : 255                                                                                                    |       |  |
| IIa | hsHDAC10   | 142     | :NGFCFENNVAIAAAHAKOK--HGLHRIILVWDVWDVHHGGQTOYLEDDPSVLYFSWHRYEHRGFWPFRSDADAVGRGQGLGFTVNLVWNO---VMGNAD     | : 237                                                                                                    |       |  |
|     | hsHDAC4    | 810     | :MGFCYFNSVAVAAKLLQQR--LSVSKLLIWDVWDVHHGNGTQQAIFYSDPSVLYMSLHRYDDGNFFPG--SGAPDEVTGTPGVGFNNMAFTGGGLDPPMGDAE | : 906                                                                                                    |       |  |
|     | hsHDAC7    | 677     | :MGFCFFNSVAVACRQLQQQ--SKASKLIIWDVWDVHHGNGTQOTFYQDPSVLYLSLHRHDDGNFFPG--SGAVDEVTGAGSGEGFNVAWAGGLDPPMGDPE   | : 773                                                                                                    |       |  |
|     | hsHDAC9    | 790     | :MGFCFFNSVAVTAKYLKDC--LNIISKLLIWDVWDVHHGNGTQAIFYSDPSVLYLSLHRYDEGNFFPG--SGAPNEVTGTLGEGYNNIAWTGGGLDPPMGDVE | : 886                                                                                                    |       |  |
|     | hsHDAC5    | 840     | :MGFCFFNSVAVTAKLLQQR--LNVGKVLIIWDVWDVHHGNGTQAIFYSDPSVLYLSLHRYDNGNFFPG--SGAPDEVTGGGPGVGYNNVAWAGGLDPPMGDVE | : 936                                                                                                    |       |  |
|     | dmHDAC4    | 975     | :MGFCFFNSVAVAAKLLRQR--NPEVRRLLIWDVWDVHHGNGTQAIFYSDPSVLYLSLHRYDDGNFFPG--TGGPTECGSGAGLGFNNISWSGALNPPGLGDAE | : 1072                                                                                                   |       |  |
|     | dpHDAC4    | 897     | :MGFCFFNSVAVAAKLLRQR--NPEVRRLLIWDVWDVHHGNGTQAIFYSDPSVLYLSLHRYDDGNFFPG--TGGPTECGSGAGLGFNNISWSGALNPPGLGDAE | : 994                                                                                                    |       |  |
|     | ceHDA-4    | 501     | :MGFCFFNSVAVAVKYLQTKYPAQCAKLAIDWDVWDVHHGNGTQAIFYSDPSVLYLSLHRYDDGNFFPG--TGSVTEVTGKNDKGLTNNVPSGD---VMRDEE  | : 596                                                                                                    |       |  |
|     | cbHDA-4    | 635     | :LGFCFFNSVAVTAKVLAQKYPQCAKLAIDWDVWDVHHGNGTQLSFDDDPNVLYMSLHRYDDGNFFPG--TGSVTEVTGKNDKGLTNNVPSGD---VMRDEE   | : 730                                                                                                    |       |  |
|     | ciHDAC4    | 747     | :MAFCYFNSVAVAAKLLQRCQDPTVRRVLIWDVWDVHHGNGTQNIFFDDPSVLYLSIHRYSQGRFPHKASNWSSTGFGQGGYTNVVPWNO---VMGRDAD     | : 845                                                                                                    |       |  |
|     | csHDAC4    | 652     | :MAFCFFNSVAVAAKLLQRCQDPTVRRVLIWDVWDVHHGNGTQNIFFDDPSVLYLSIHRYSQGRFPHKASNWSSTGFGQGGYTNVVPWNO---VMGRDAD     | : 750                                                                                                    |       |  |
|     | hrHDAC4    | 174     | :MAFCYFNSVAVAAKLLQRCQDPTVRRVLIWDVWDVHHGNGTQNIFFDDPSVLYLSIHRYSQGRFPHKASNWSSTGFGQGGYTNVVPWNO---VMGRDAD     | : 273                                                                                                    |       |  |
|     | II         | baFB188 | 150                                                                                                      | :MGFCFENNTSVAAGYARAY--LGMERVAILIWDVWDVHHGNGTQDLMWNPVSVLTLISLHQLH---CFPP--DSGYSTERGAGNGHGYNNVLP---PGSGNAE | : 240 |  |

|     |            | Z       | C                                                                                                       | Mot b                                                                                                 |       |  |
|-----|------------|---------|---------------------------------------------------------------------------------------------------------|-------------------------------------------------------------------------------------------------------|-------|--|
| IV  | hsHDAC11   | 234     | :YLKVERNKKSLOEHLPPVVVYNGTDILRGDR--GGLSISPAGLVQRDEIVFRVYRGR-RVPIILMVTSGGYCKRTARITADSTINFGIGLIGPE---      | : 328                                                                                                 |       |  |
|     | aaHDLP     | 230     | :FLFALBKSTLIVKVFPEPEYLLQGTDPLEEDY--SKFNLSNVAFLKAFNIVREVFQ---EGVYIGGGGYHPYALARAWTLIWCBSGRVPEKLN          | : 323                                                                                                 |       |  |
| I   | hsHDAC1    | 237     | :YBAIFKPVMSKVMENFQPSAVVLQCGSDLSGDR--GCFNLTIKGHAKCIVEVKSFN--PMLMIGGGYTIIRNVARCWTYETAVALDTEIPNELPY        | : 330                                                                                                 |       |  |
|     | hsHDAC2    | 238     | :YQIFKPLISKVMEYQPSAVVLQCGADSLGDR--GCFNLTIVKGHAKCIVEVKTEN--PMLMIGGGYTIIRNVARCWTYETAVALDTEIPNELPY         | : 331                                                                                                 |       |  |
|     | hsHDAC3    | 232     | :YKHIFQPVNQVDFYQPTCIVLQCGADSLGDR--GCFNLTISIRGHGCEVYKSFN--PMLMIGGGYTIIRNVARCWTYETAVALDTEIPNELPY          | : 325                                                                                                 |       |  |
|     | hsHDAC8    | 240     | :YYQICBSVLKBYOAFENPKAVVLOGADTLGDEP--CSFNMTPEGLCKLKYLLQWOL---ATLILGGGYNLANTARCWTYLTGVILGKTSSEIPE         | : 333                                                                                                 |       |  |
| II  | hsHDAC6_D1 | 319     | :YIAAFLHVLIPVALEFPQQLVVAAGFDAIQGDPK--GEMAAIPAGFAQLTHLLMGLAGG---KLTLISLEGGYNLRALAEVSAISLHTLLG-DPCPML--   | : 410                                                                                                 |       |  |
|     | hsHDAC6_D2 | 256     | :YLAAWHRLVLIPIAYEFNPBLVLSAGFDAARGDP--GGCQVSPFEGYAHLLHLLMGLASG---RIILLILEGGYNLTSISESMAACTRSLIG-DPPPLI--  | : 347                                                                                                 |       |  |
| IIa | hsHDAC10   | 238     | :YVAAFLHLLIPLAFEFDPDLVLSAGFDSALGDP--GOMQATPECF AHLTQHLQVLAGG---RVCVILEGGYHLESIAESVCHTIVQTLIG-DPPPEP--   | : 329                                                                                                 |       |  |
|     | hsHDAC4    | 907     | :YLAAFRTVMPIASEFAPDVLVLSAGFDAVEGHPTPEGGYNSARCFGYLTQQLMGLAGG---RIVLALLEGGHLLTAICDASEACVSAALLGNELDELIP--  | : 1001                                                                                                |       |  |
|     | hsHDAC7    | 774     | :YLAAFRTVMPIAREFSPDLVLSAGFDAARGHPPIGGYHVSARCFGYMTQQLMNLAGG---AVVLALLEGGHLLTAICDASEACVAALLGNRVDFLS--     | : 868                                                                                                 |       |  |
|     | hsHDAC9    | 887     | :YLAAFRTIVKPVAKFDPDMVLSAGFDAIRGHTPPGGYKVTAKCFGHLLTQQLMNLAGG---RVVLALLEGGHLLTAICDASEACVNALLGNELDELIP--   | : 981                                                                                                 |       |  |
|     | hsHDAC5    | 937     | :YLAAFRTVMPIAREFSPDVLVLSAGFDAVEGHLSPIGGYHVSARCFGHLLTQQLMNLAGG---RVVLALLEGGHLLTAICDASEACVSAALLGNRVDFLS-- | : 1031                                                                                                |       |  |
|     | dmHDAC4    | 1073    | :YIAAFRTVMPIAREFNPDLVLSAGFDAATGHPIGGYHVSARCFGFMTRQLMNLANG---KVVLALEGGYDLAAICDASAQECVRAALLGDPAAPIA--     | : 1167                                                                                                |       |  |
|     | dpHDAC4    | 995     | :YIAAFRTVMPIAKGFNPDLVLSAGFDAATGHPIGGYHVSARCFGFMTRQLMNLANG---KVVLALEGGYDLAAICDASAQECVRAALLGDPAAPIA--     | : 1089                                                                                                |       |  |
|     | ceHDA-4    | 597     | :YLAAWRTVTEPVMASFCDPELIVLSAGFDACHGHNPALGGYEVTPPEFGYMTKSLINYSAG---KVVLALEGGYDLKSTSEAAQOCVQALIGESDDAGR--  | : 691                                                                                                 |       |  |
|     | cbHDA-4    | 731     | :YLAAWRTVTEPVLASFCDPELIVLSAGFDACHGHNPALGGYEVTPPEFGYMTKCLLSYANG---KVVLALEGGYDLKSTSEAAQOCVQALIGESDDAGR--  | : 825                                                                                                 |       |  |
|     | ciHDAC4    | 846     | :YLAAFRTIVPIARQFDPHEVLVLSAGFSAANGHPSTLGGYKTPNFCYGLLTLRSLSEVAGG---KIVLLEGGFELEPNCDCTEACVRLTLGNHSESNL--   | : 940                                                                                                 |       |  |
|     | csHDAC4    | 751     | :YLAAFRSIVLPIARKFNPHFVLVSCGFSAAAGHPSTLGGYNTPNCFGYLTRSLSEVLAGG---KIVLLEGGFELEPNCNCAEACVQTLGKSEYSSL--     | : 845                                                                                                 |       |  |
|     | hrHDAC4    | 274     | :YLAAFRTVMPIAREFDPDLVLSAGFSAANGHPSTLGGYKTPNFCYGLLTLRSLSEVAGG---RIVMILEGGFELEPNCDCSVEICVRLTLSEDNAAVY--   | : 368                                                                                                 |       |  |
|     | II         | baFB188 | 241                                                                                                     | :YLHAMDQVLPALRAYRPQLLIVGSGFDASMLDPE--ARMNVTAAGFRQMARRTIDCAADICGRIMEVQEGGYSPHYIPFCGLAVIEELTGVRSILPDPYH | : 339 |  |
