# Supplementary material
Source: PubMed Central journal article supplement (PMC2077257)

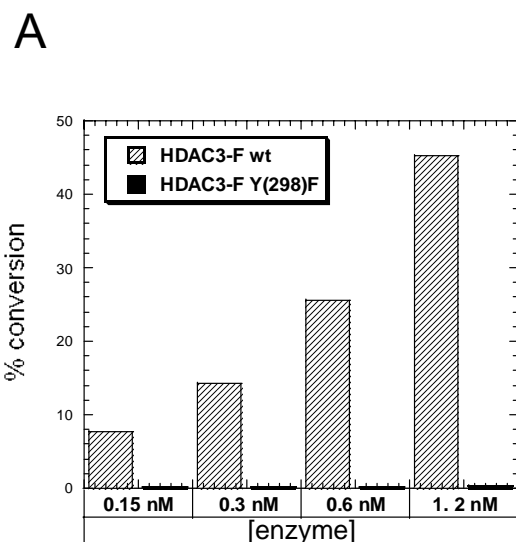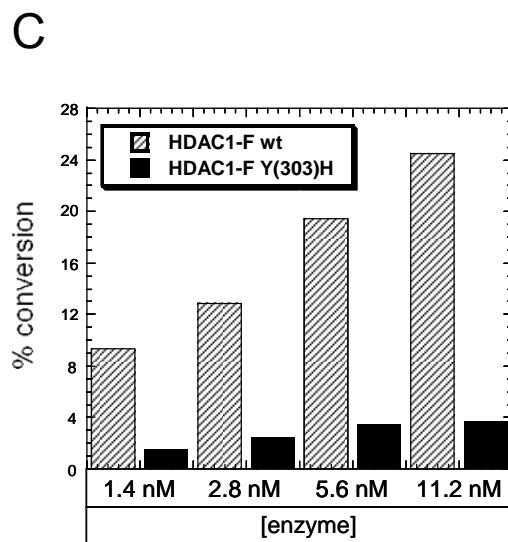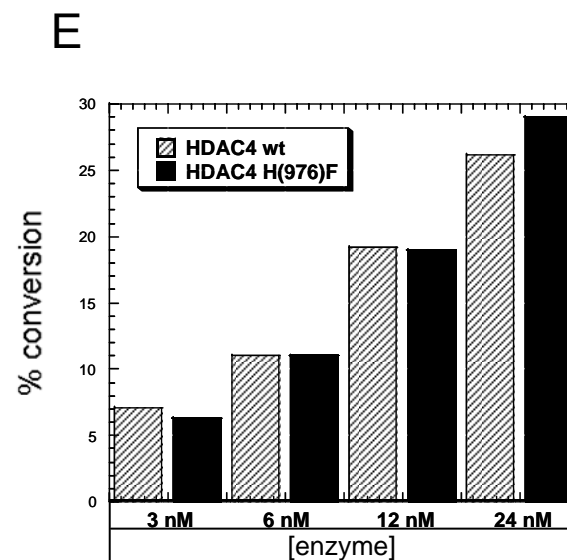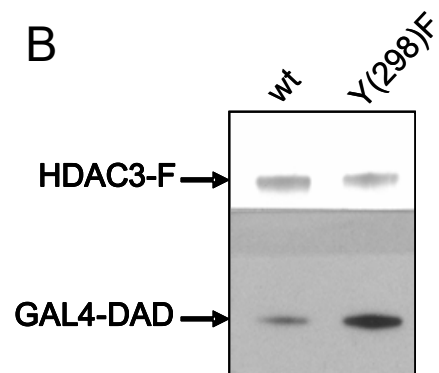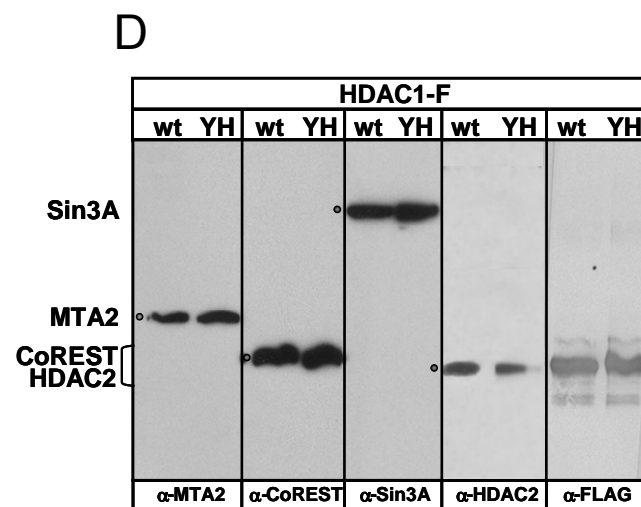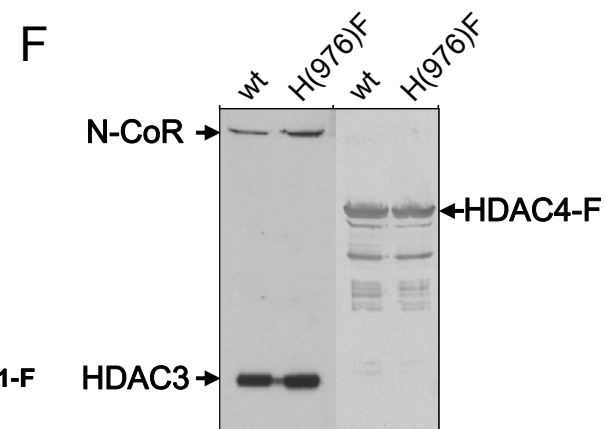

Supplement: pnas_0706487104_2.pdf [file pnas_0706487104_2.pdf]

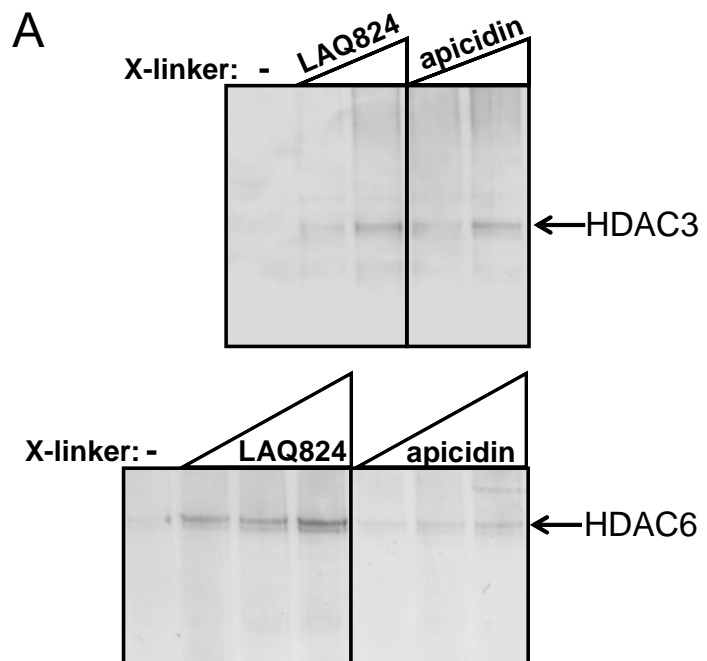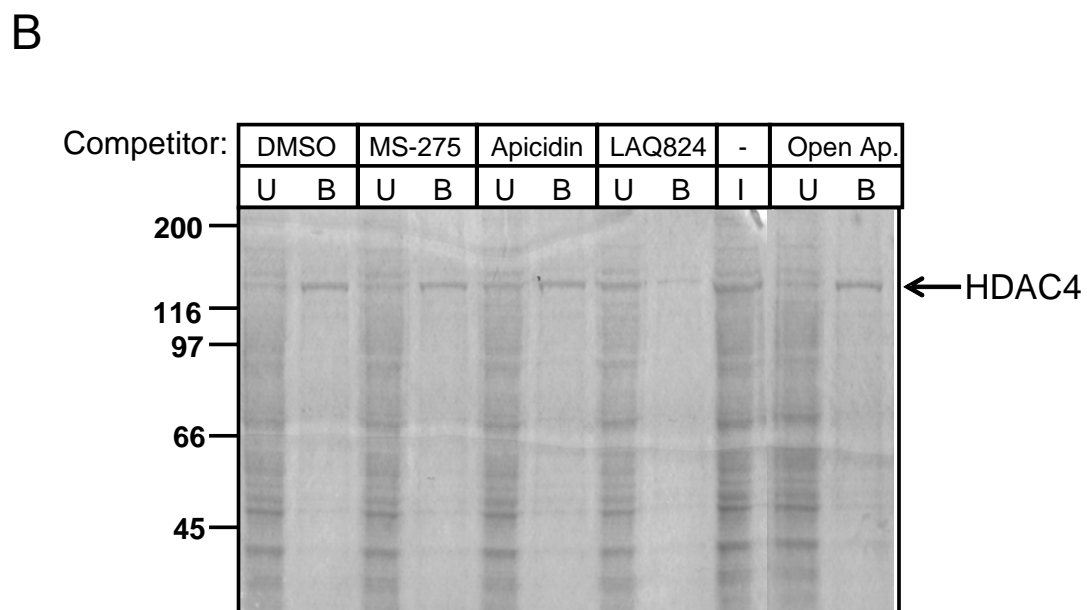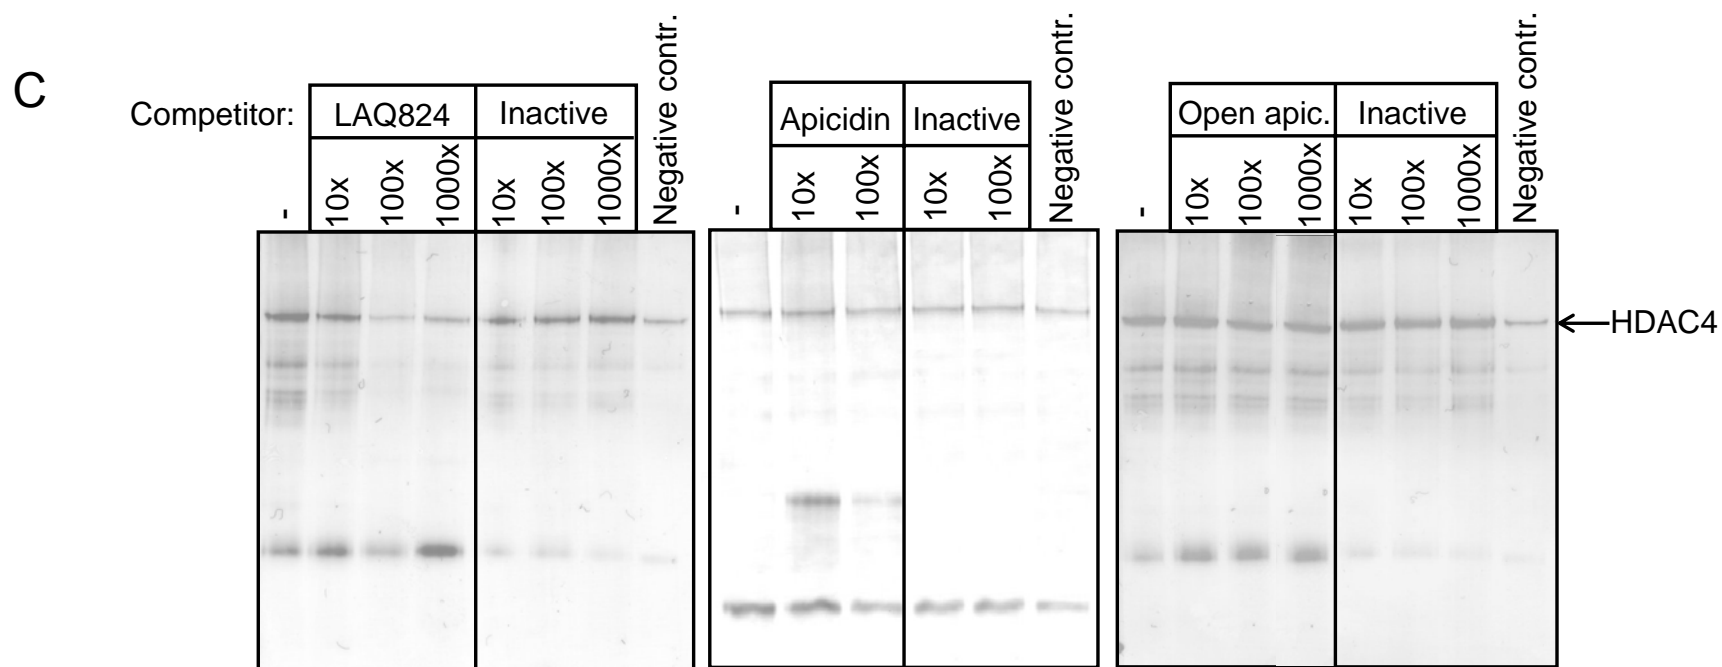

Supplement: pnas_0706487104_3.pdf [file pnas_0706487104_3.pdf]

A

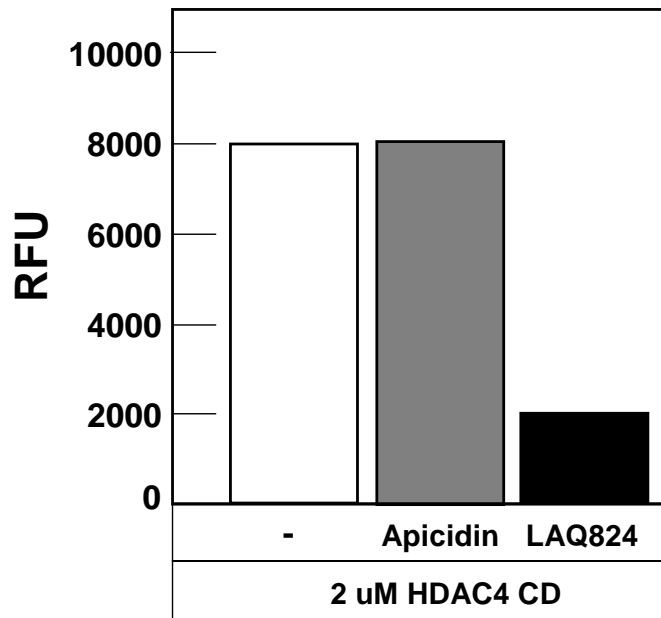

B

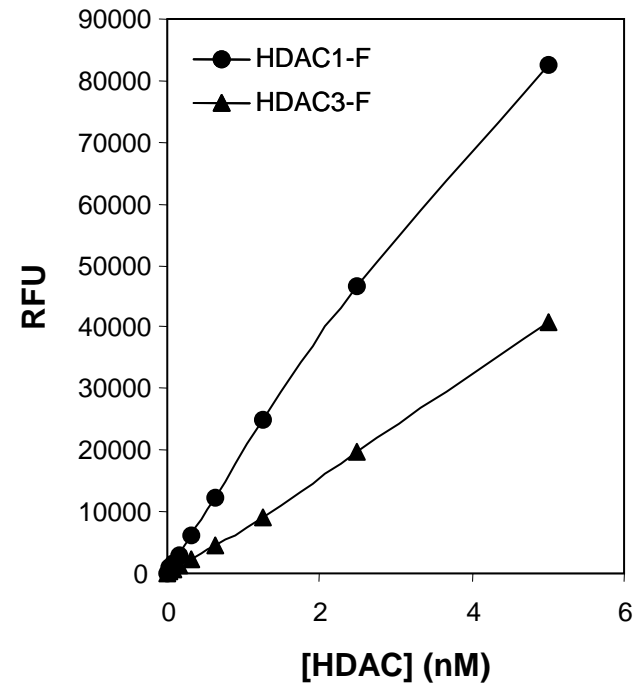

Supplement: pnas_0706487104_4.pdf [file pnas_0706487104_4.pdf]

A

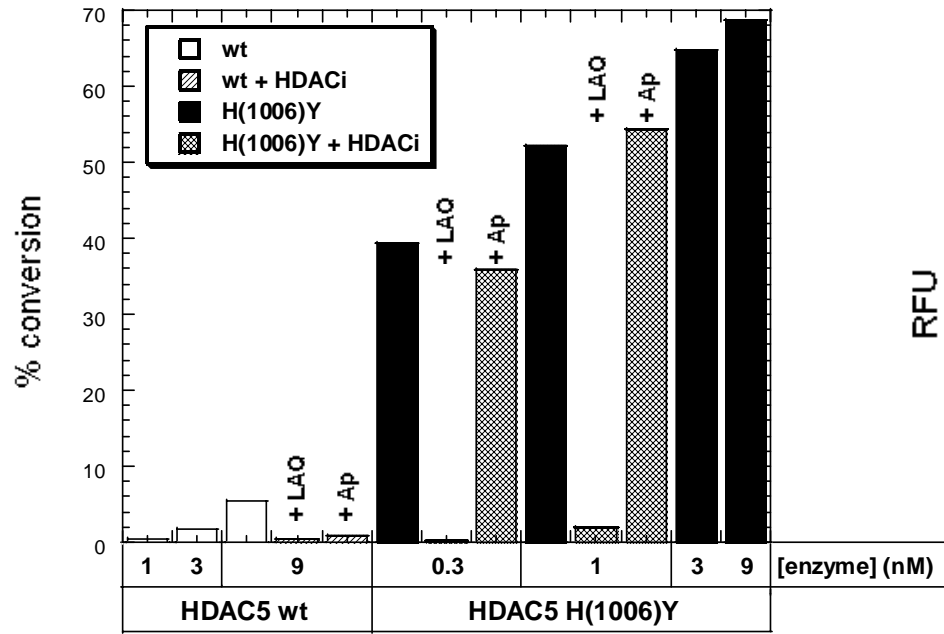

B

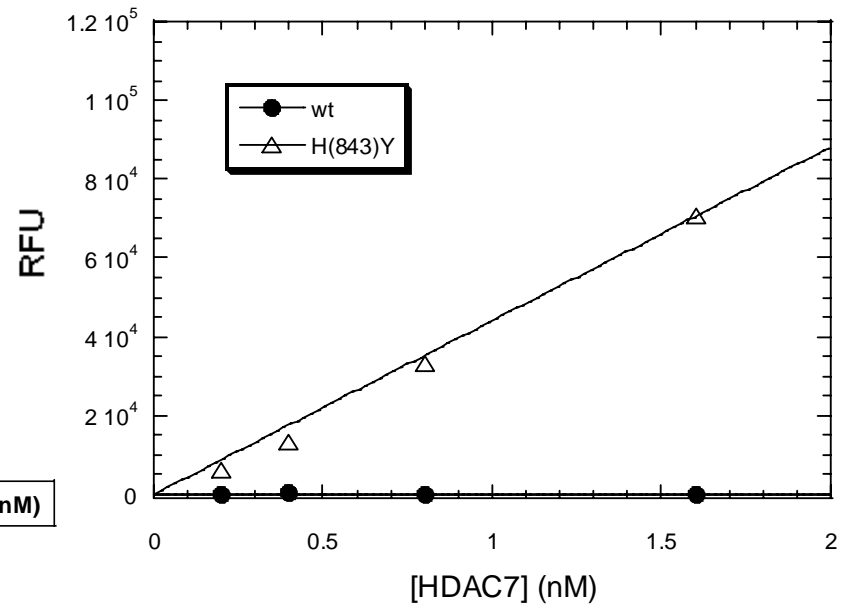

Supplement: pnas_0706487104_5.pdf [file pnas_0706487104_5.pdf]

**A**

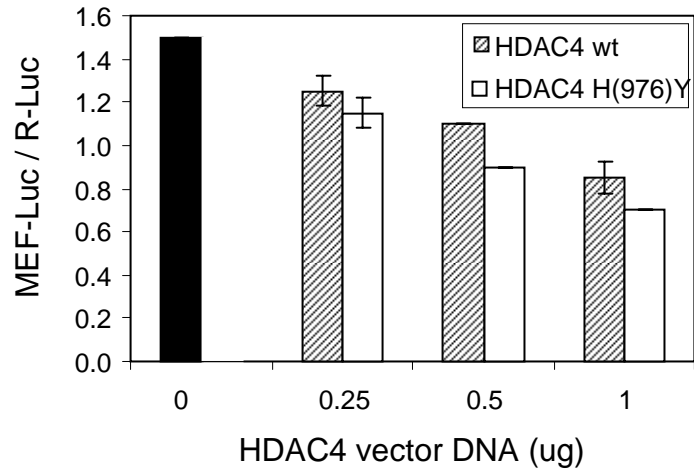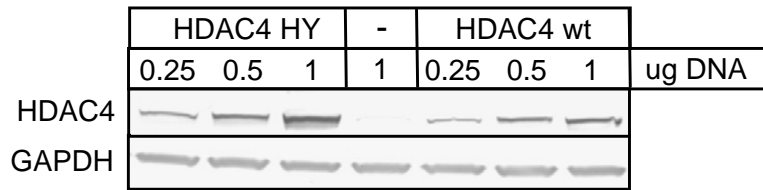

**B**

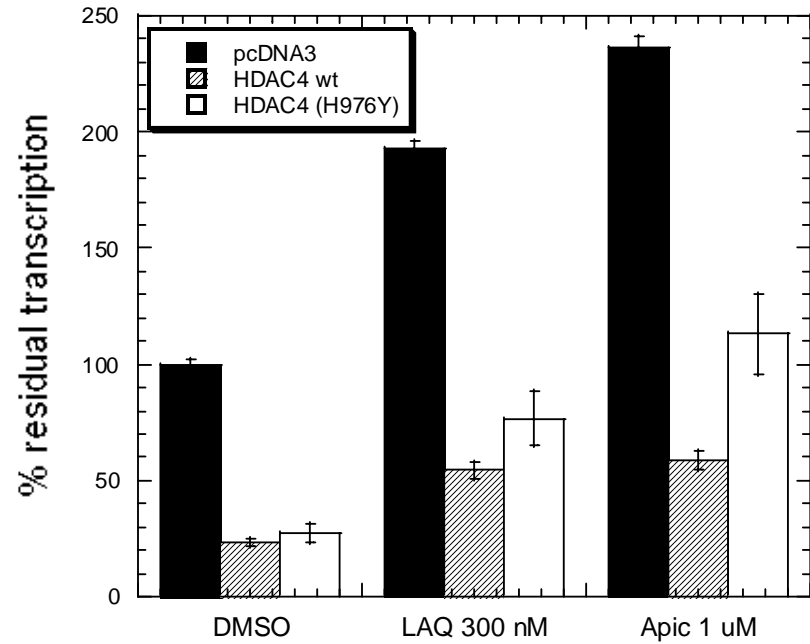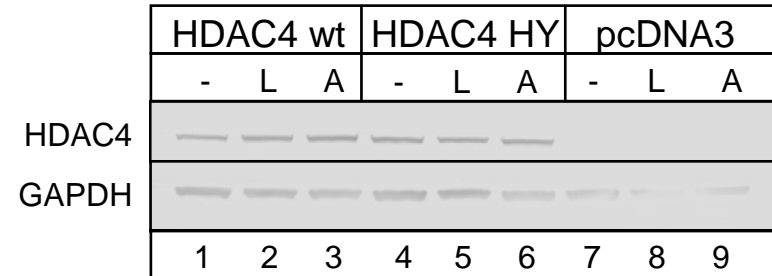

Supplement: pnas_0706487104_6.pdf [file pnas_0706487104_6.pdf]
